# Supplementary figures and images for: An arbitrary-spectrum spatial visual stimulator for vision research
Source: eLife journal article supplement (doi:10.7554/elife.48779), 2019-09-23

**Figure 2 - figure supplement 4**

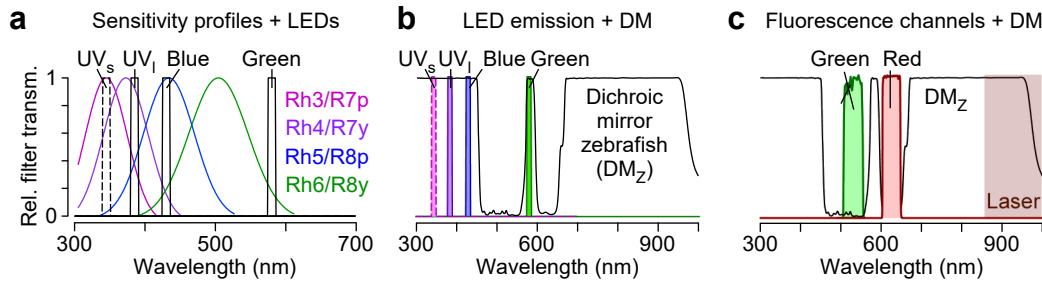

Supplement: supp [file elife-48779-supp-v1.zip]

**Figure 4 - figure supplement 1**

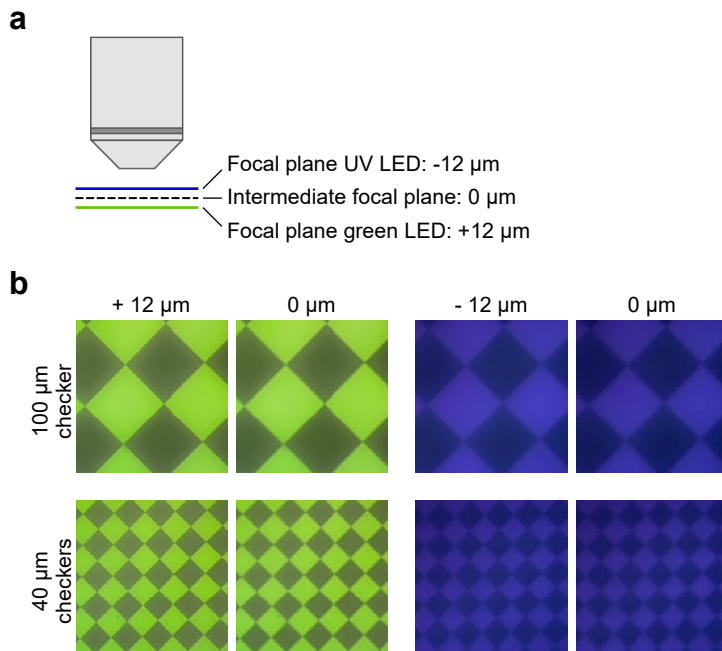

Supplement: supp [file elife-48779-supp-v1.zip]

**Figure 2 - figure supplement 5**

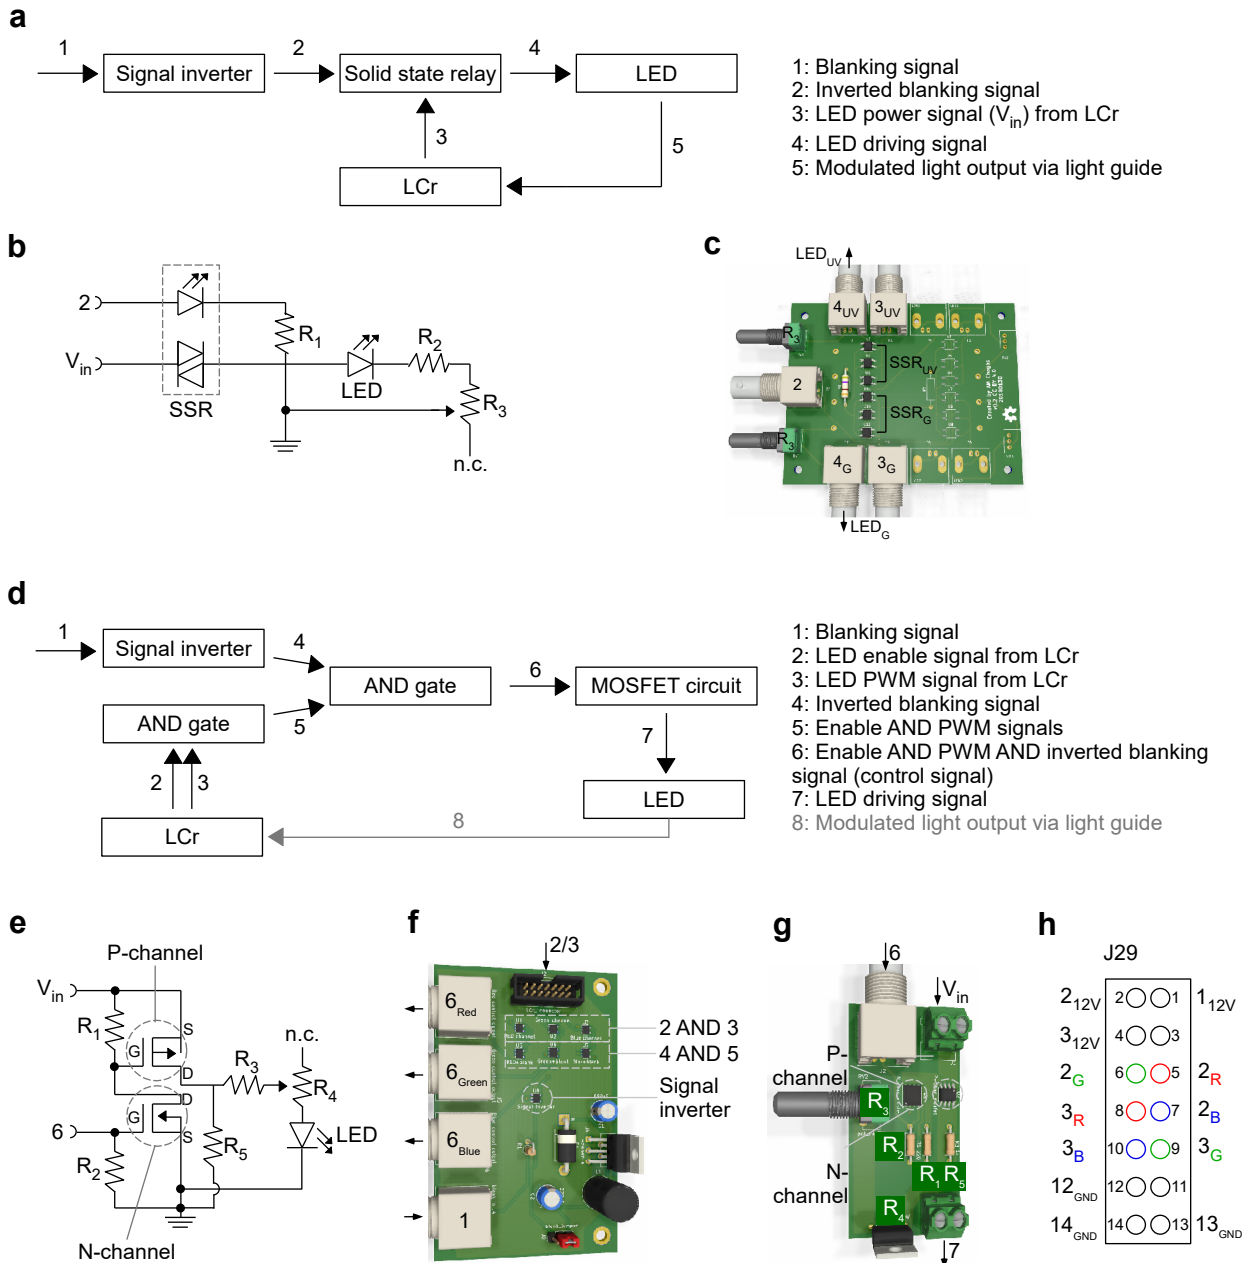

Supplement: supp [file elife-48779-supp-v1.zip]

Figure 2 - figure supplement 6

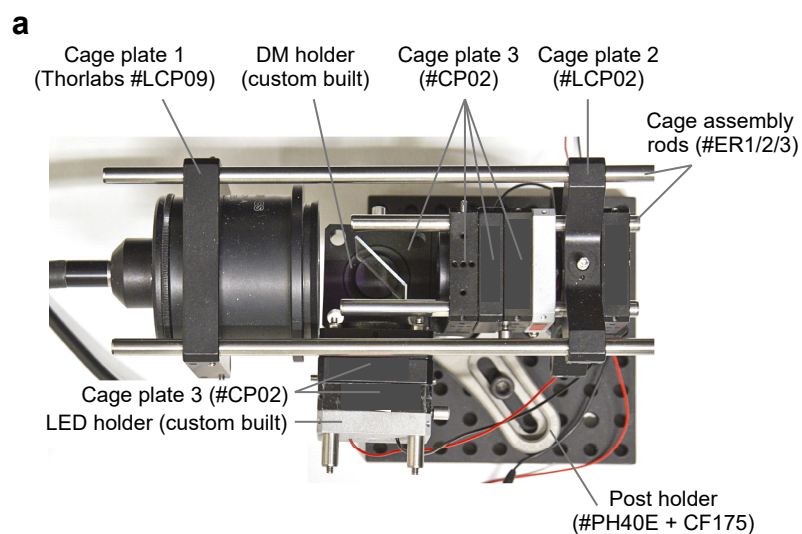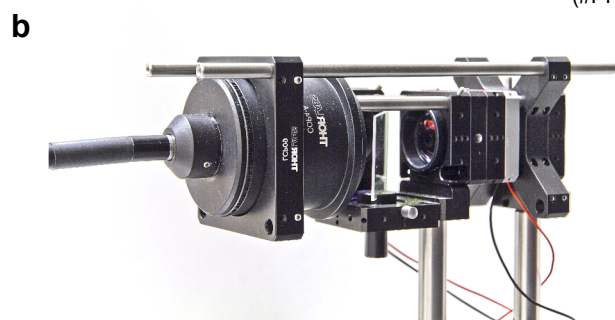

Supplement: supp [file elife-48779-supp-v1.zip]

Figure 2 - figure supplement 1

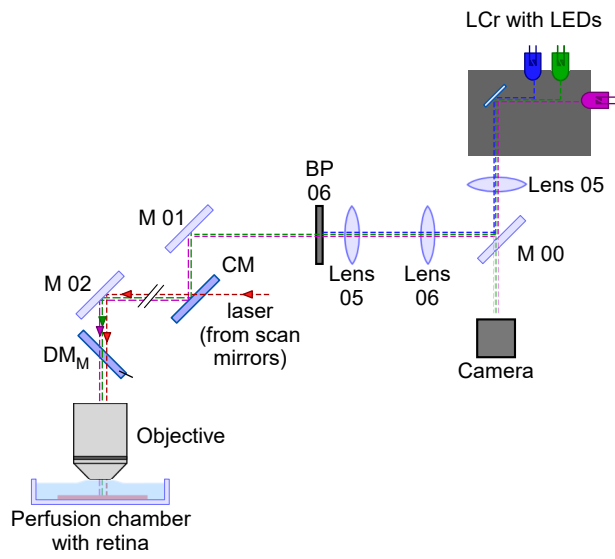

Supplement: supp [file elife-48779-supp-v1.zip]

Figure 2 - figure supplement 2

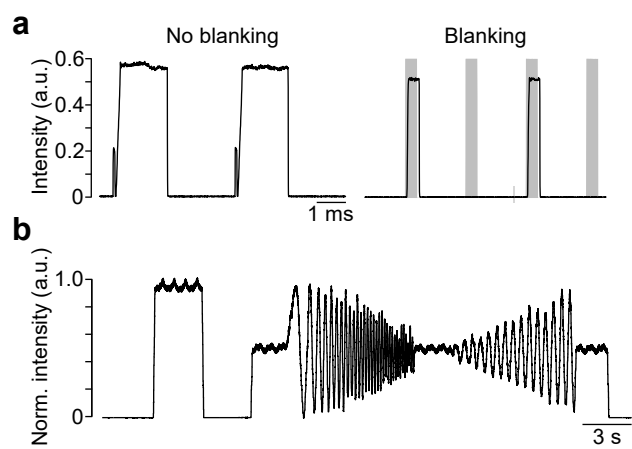

Supplement: supp [file elife-48779-supp-v1.zip]

Figure 2 - figure supplement 3

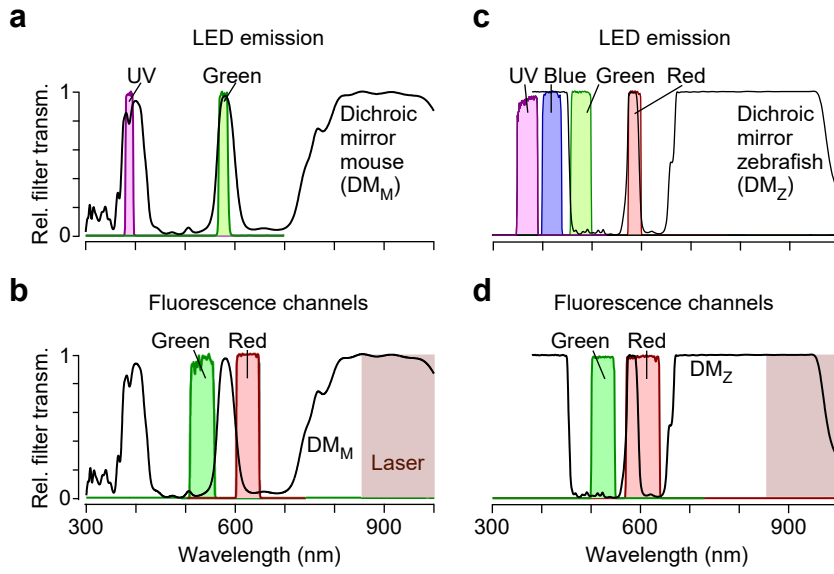

Supplement: supp [file elife-48779-supp-v1.zip]
